# Supplementary material
Source: PubMed Central journal article supplement (PMC6709946)
Supplement: Supp_Fig1.pdf [file Supp_Fig1.pdf]

## Supplementary Data

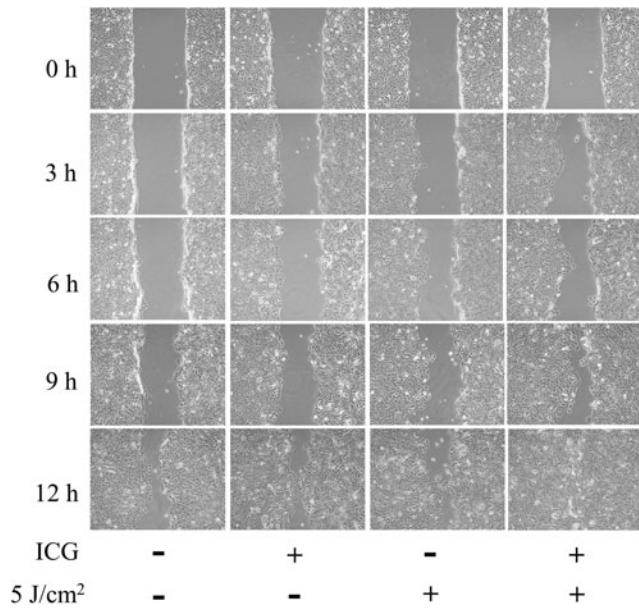

**Supplementary Figure S1.** Different controls of ICG-PDT-conditioned medium on cell migration. A gap was created at the center of a HaCaT cell sheet. The controls include absolute control (no ICG was added and no light exposure); dark control (no light exposure after ICG incubation); and light control (exposure to 5 J/cm<sup>2</sup> without ICG). The gaps were monitored with a digital camera at different time points until one of the gaps was completely healed. Data represent one example from three separate experiments. Scale bar = 100  $\mu$ m. ICG, indocyanine green; PDT, photodynamic therapy.
