# Supplementary material
Source: PubMed Central journal article supplement (PMC6709946)
Supplement: Supp_Fig2.pdf [file Supp_Fig2.pdf]

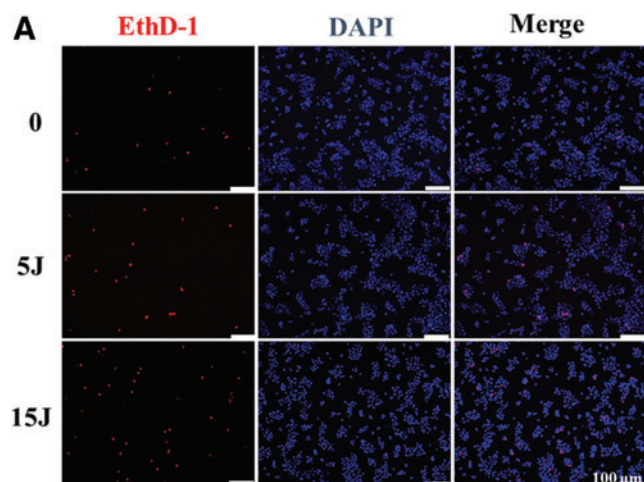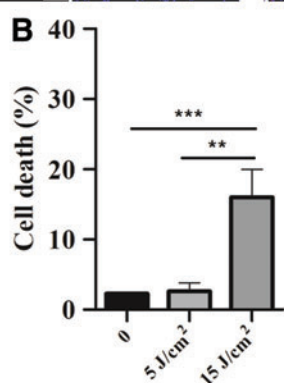

**Supplementary Figure S2.** ICG-PDT-conditioned medium-induced cell death. **(A)** Representative immunofluorescence image showing the expression of EthD-1 with HaCaT cells exposed to different doses of ICG-PDT (0, 5, and 15 J/cm<sup>2</sup>)-conditioned medium. **(B)** The intensity values were averaged for five images from three separate experiments. \*\* $p < 0.01$ , \*\*\* $p < 0.001$  compared with the control, Tukey's comparison test, one-way ANOVA. Scale bar = 100  $\mu$ m. ANOVA, analysis of variance.
