# Supplementary material
Source: PubMed Central journal article supplement (PMC6709946)
Supplement: Supp_Fig3.pdf [file Supp_Fig3.pdf]

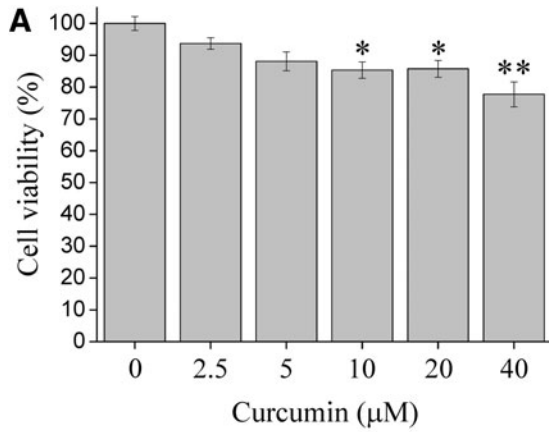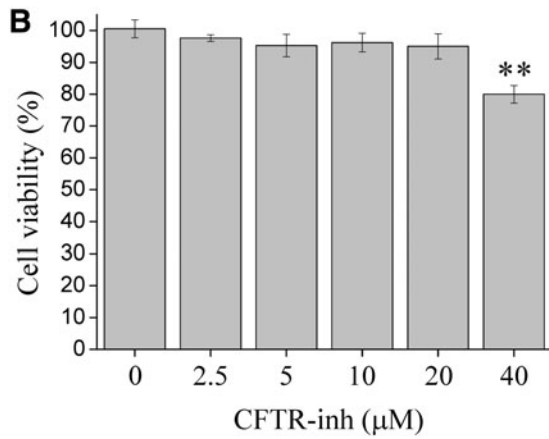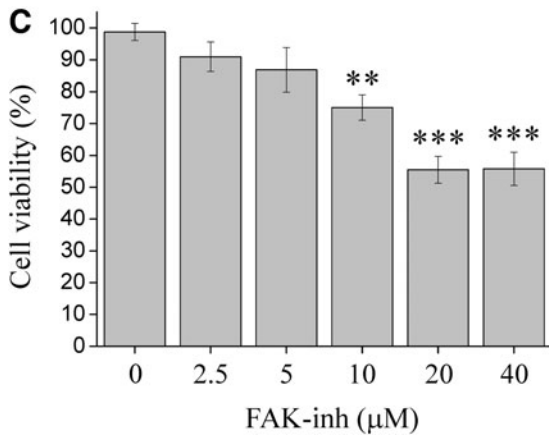

**Supplementary Figure S3.** Cell viability of HaCaT cells after 24 h of incubation with different chemicals. **(A)** Curcumin, **(B)** CFTR inhibitor 172 (CFTR-inh), and **(C)** FAK inhibitor 14 (FAK-inh). Concentrations less than 10 μM curcumin, 40 μM CFTR-inhibitor 172, and 10 μM FAK inhibitor 14 did not affect cell viability (\* $p < 0.05$ , \*\* $p < 0.01$ , \*\*\* $p < 0.001$  one-way ANOVA, Tukey's multiple comparison test compared with the control), respectively. Figures are representative data from one of three separate experiments with six replicates in each experiment. CFTR, cystic fibrosis transmembrane conductance regulator; FAK, focal adhesion kinase.
